# Supplementary material
Source: Springer Nature journal article supplement (https://www.springermedizin.de/resource/supplementary/12913_2013_2706_MOESM2_ESM.pdf/9531102)
Supplement: MOESM2 [file 9531102]

## Cash billing

Go to cashier

Take number and wait  
for it to be called

Pay clerk cash and  
receive change

Receipt printed and  
delivered

Go to Pharmacy

## Smartcard billing

Nurse asks if patient has  
smartcard to use in OPD

Smartcard placed in the  
reader and billed

Receipt printed and  
delivered

Go to Pharmacy
